# Supplementary material for: Spatially explicit network analysis reveals multi‐species annual cycle movement patterns of sea ducks
Source: PubMed Central journal article supplement — Ecol Appl. 2019 May 29;29(5):e01919. doi: 10.1002/eap.1919 (PMC6851985; doi:10.1002/eap.1919), 2019-05-29
Supplement: EAP-29-na-s001.pdf [file EAP-29-na-s001.pdf]

## Supporting Information

Spatially-explicit network analysis reveals multi-species annual-cycle movement patterns of sea ducks

Juliet S. Lamb, Peter W.C. Paton, Jason E. Osenkowski, Shannon S. Badzinski, Alicia M. Berlin, Tim Bowman, Chris Dwyer, Luke J. Fara, Scott G. Gilliland, Kevin Kenow, Christine Lepage, Mark L. Mallory, Glenn H. Olsen, Matthew C. Perry, Scott A. Petrie, Jean-Pierre L. Savard, Lucas Savoy, Michael Schummer, Caleb S. Spiegel, and Scott R. McWilliams

Ecological Applications

Appendix S1

Table S1. Deployment details and transmitter specifications for all PTTs deployed during the Atlantic and Great Lakes Sea Duck Migration Study, 2002-2017.

| Species | Year | Dates          | Capture technique                 | #  | F  | M  | Region                  | Subregion       | Lat   | Lon    | Owner        | Duty Cycle [hrs on / hrs off (# of days)] | Manufacturer                   | Mass (g)    |
|---------|------|----------------|-----------------------------------|----|----|----|-------------------------|-----------------|-------|--------|--------------|-------------------------------------------|--------------------------------|-------------|
| BLSC    | 2002 | 8-10 May       | Night light/dipnet                | 13 | 2  | 11 | New Brunswick           | Chaleur Bay     | 48.08 | -66.58 | SDJV         | 6/48                                      | Microwave                      | 38          |
|         | 2003 | 17-Apr         | Net gun                           | 2  | 2  | 0  | Mid-Atlantic            | Chesapeake Bay  | 38.75 | -76.42 | SDJV         | 6/48                                      | Microwave                      | 38          |
|         | 2003 | 17-28 May      | Night light/dipnet                | 9  | 3  | 6  | New Brunswick           | Chaleur Bay     | 48.08 | -66.58 | SDJV         | 6/48                                      | Microwave                      | 38          |
|         | 2004 | 13-17 May      | Night light/dipnet                | 9  | 5  | 4  | New Brunswick           | Chaleur Bay     | 48.08 | -66.58 | SDJV         | 6/48                                      | Microwave                      | 38          |
|         | 2009 | 2-6 May        | Night light/dipnet                | 16 | 16 | 0  | New Brunswick           | Chaleur Bay     | 48.04 | -66.37 | SDJV/<br>CWS | 6/72                                      | Microwave                      | 38          |
|         | 2010 | 2-9 May        | Night light/dipnet                | 47 | 19 | 28 | Quebec/New<br>Brunswick | Chaleur Bay     | 48.10 | -66.52 | SDJV/<br>CWS | 2/72                                      | Microwave                      | 38          |
| COEI    | 2010 | 5-11 Dec       | Floating mist net                 | 17 | 7  | 10 | S. New England          | Rhode Island    | 41.46 | -71.34 | SDJV         | 4/24 (116), 4/96                          | Microwave                      | 38          |
|         | 2010 | 17-May         | Floating mist net,<br>Fishing net | 4  | 4  | 0  | Gulf of Maine           | Maine           | 43.75 | -69.89 | BRI          | 6/120, 8/48                               | Microwave                      | 38          |
|         | 2011 | 14 Nov-11 Dec  | Floating mist net                 | 26 | 26 | 0  | S. New England          | Rhode Island    | 41.42 | -71.46 | URI          | 4/24 (118), 4/96                          | Microwave                      | 38          |
|         | 2012 | 6-Jun          | Floating mist net,<br>Fishing net | 4  | 4  | 0  | Gulf of Maine           | Maine           | 43.89 | -69.13 | BRI          | 6/120<br>8/48                             | Northstar<br>Microwave         | 26<br>38    |
|         | 2013 | 30 Apr - 1 May | Floating mist net,<br>Fishing net | 11 | 6  | 5  | Gulf of Maine           | Boston Harbor   | 42.34 | -70.90 | USFWS        | 2/72                                      | Telonics                       | 45          |
|         | 2014 | 29 Apr-1 May   | Floating mist net,<br>Fishing net | 19 | 9  | 10 | Gulf of Maine           | Boston Harbor   | 42.31 | -70.93 | USFWS        | 2/72                                      | Telonics                       | 35          |
|         | 2014 | 29-30 May      | Fishing net                       | 9  | 9  | 0  | Nova Scotia             | Nova Scotia     | 44.87 | -62.28 | Acadia       | 3/72<br>8/48                              | Telonics (5)<br>Microwave (7)  | 35<br>46-49 |
|         | 2015 | 12-14 May      | Floating mist net,<br>Fishing net | 15 | 7  | 8  | Gulf of Maine           | Boston Harbor   | 42.34 | -70.90 | USFWS        | 2/72                                      | Telonics                       | 35          |
| LTDU    | 2007 | 13-14 Dec      | Night light/dipnet                | 6  | 2  | 4  | S. New England          | Nantucket Sound | 41.28 | -70.20 | SDJV         | 4/48; 4/168                               | Microwave                      | 26          |
|         | 2008 | 12-18 Dec      | Night light/dipnet                | 8  | 2  | 6  | S. New England          | Nantucket Sound | 41.28 | -70.20 | SDJV         | 4/48; 4/168                               | Microwave                      | 26          |
|         | 2008 | 22-24 Nov      | Night light/dipnet                | 10 | 6  | 4  | S. New England          | Nantucket Sound | 41.29 | -70.17 | SDJV         | 4/48; 4/168                               | Microwave                      | 26          |
|         | 2010 | 3-9 Mar        | Night light/dipnet                | 14 | 5  | 9  | S. New England          | Nantucket Sound | 41.67 | -70.06 | SDJV         | 4/48; 4/168                               | Microwave                      | 26          |
|         | 2010 | 20-22 Mar      | Night light/dipnet                | 2  | 0  | 2  | Mid-Atlantic            | Chesapeake Bay  | 38.67 | -76.34 | SDJV         | 4/48; 4/168                               | Microwave                      | 26          |
|         | 2011 | 21-26 Feb      | Mist net/ Lift net                | 20 | 6  | 14 | Great Lakes             | Lake Ontario    | 43.30 | -79.80 | SDJV         | 4/72                                      | Microwave                      | 26          |
|         | 2011 | 13 Mar - 1 Apr | Night light/dipnet                | 7  | 2  | 5  | Mid-Atlantic            | Chesapeake Bay  | 38.72 | -76.28 | SDJV         | 4/72                                      | Microwave                      | 26          |
|         | 2011 | 5-16 Dec       | Mist net/ Lift net                | 19 | 13 | 6  | Great Lakes             | Lake Ontario    | 43.86 | -77.48 | SDJV         | 4/48 (130), 4/72<br>4/72                  | Telonics (14)<br>Microwave (5) | 35          |
|         | 2012 | 18-29 Feb      | Night light/dipnet                | 4  | 4  | 0  | Mid-Atlantic            | Chesapeake Bay  | 38.21 | -75.88 | SDJV         | 4/72                                      | Microwave                      | 26          |
|         | 2012 | 4-5 Mar        | Night light/dipnet                | 5  | 5  | 0  | Mid-Atlantic            | Chesapeake Bay  | 38.70 | -76.26 | SDJV         | 4/24 (134), 4/13<br>(66), 2/120           | Telonics                       | 35          |

|      |               |                    |                    |    |    |                   |                      |                      |        |        |                                               |                                |           |    |
|------|---------------|--------------------|--------------------|----|----|-------------------|----------------------|----------------------|--------|--------|-----------------------------------------------|--------------------------------|-----------|----|
| SUSC | 2012          | 19-29 Mar          | Mist net/ Lift net | 17 | 15 | 2                 | Great Lakes          | Lake Ontario         | 43.64  | -79.39 | SDJV                                          | 4/48 (130), 4/72               | Telonics  | 35 |
|      | 2012          | 3-May              | Mist net           | 1  | 1  | 0                 | Gulf of Maine        | Casco Bay            | 43.77  | -70.15 | SDJV                                          | 4/48 (130), 4/72               | Telonics  | 35 |
|      | 2012          | 6-8 Dec            | Mist net/ Lift net | 8  | 7  | 1                 | Great Lakes          | Lake Ontario         | 43.95  | -76.84 | SDJV                                          | 4/48 (130), 4/72               | Telonics  | 35 |
|      | 2013          | 9-15 Mar           | Mist net/ Lift net | 10 | 10 | 0                 | Great Lakes          | Lake Ontario         | 43.65  | -79.35 | SDJV                                          | 4/48 (60), 4/72                | Telonics  | 35 |
|      | 2015          | 8-10 Nov           | Floating mist net  | 2  | 2  | 0                 | S. New England       | Nantucket Sound      | 41.67  | -69.99 | SDJV                                          | 4/72 (57), 4/96                | GeoTrak   | 26 |
|      | 2015          | 12-15 Dec          | Floating mist net  | 13 | 13 | 0                 | S. New England       | Nantucket Sound      | 41.67  | -69.99 | SDJV                                          | 4/72 (57), 4/96                | GeoTrak   | 26 |
|      | 2016          | 12-Mar             | Night light        | 1  | 1  | 0                 | Great Lakes          | Lake Michigan        | 44.14  | -87.56 | SDJV                                          | 3/72                           | Telonics  | 35 |
|      | 2016          | 22-Mar             | Floating mist net  | 1  | 1  | 0                 | S. New England       | Long Island Sound    | 40.97  | -72.86 | SDJV                                          | 4/72 (57), 4/96                | GeoTrak   | 26 |
|      | 2016          | 29-Apr             | Night light        | 1  | 1  | 0                 | Great Lakes          | Lake Michigan        | 45.97  | -86.07 | SDJV                                          | 3/72                           | Telonics  | 35 |
|      | 2016          | 30 Oct-22 Nov      | Night light        | 7  | 2  | 5                 | Great Lakes          | Lake Michigan        | 44.14  | -87.60 | SDJV                                          | Females: 3/72<br>Males: 2/10   | Telonics  | 35 |
|      | 2016          | 29 Nov-9 Dec       | Floating mist net  | 19 | 19 | 0                 | S. New England       | Nantucket Sound      | 41.67  | -70.02 | SDJV                                          | 3/72                           | Telonics  | 35 |
|      | 2001          | 22 Mar-12 Apr      | Net gun            | 4  | 0  | 4                 | Mid-Atlantic         | Chesapeake Bay       | 38.75  | -76.42 | SDJV                                          | 6/48                           | Microwave | 38 |
|      | 2002          | 28 Mar-6 Apr       | Net gun            | 5  | 0  | 5                 | Mid-Atlantic         | Chesapeake Bay       | 38.75  | -76.42 | SDJV                                          | 6/48                           | Microwave | 38 |
|      | 2004          | 24 Mar - 13 Apr    | Net gun            | 5  | 5  | 0                 | Mid-Atlantic         | Chesapeake Bay       | 38.75  | -76.42 | SDJV                                          | 6/48                           | Microwave | 38 |
|      | 2005          | 15-22 Apr          | Submerged net      | 4  | 4  | 0                 | New Brunswick        | Chaleur Bay          | 48.08  | -66.58 | SDJV                                          | 6/48                           | Microwave | 38 |
|      | 2006          | 30 Jul - 3 Aug     | Submerged net      | 14 | 0  | 14                | Labrador             | Labrador             | 56.21  | -61.19 | CWS                                           | 3/4 (60), 6/72                 | Microwave | 38 |
|      | 2010          | 4-May              | Submerged net      | 1  | 0  | 1                 | New Brunswick        | Chaleur Bay          | 48.11  | -66.20 | SDJV/<br>CWS                                  | 6/72                           | Microwave | 38 |
|      | 2010          | 7-Aug              | Submerged net      | 1  | 0  | 1                 | Quebec               | St. Lawrence Estuary | 48.74  | -69.05 | CWS                                           | 2/72                           | Microwave | 38 |
|      | 2010          | 9-Dec              | Floating mist net  | 1  | 0  | 1                 | S. New England       | Rhode Island         | 41.46  | -71.34 | SDJV                                          | 4/24 (116), 4/96               | Microwave | 38 |
|      | 2011          | 2 Mar-11 Apr       | Night light/dipnet | 17 | 4  | 13                | Mid-Atlantic         | Chesapeake Bay       | 38.72  | -76.28 | SDJV                                          |                                | Microwave | 26 |
| 2011 | 5-9 Dec       | Mist net           | 2                  | 0  | 2  | S. Atlantic Bight | Pamlico Sound        | 35.34                | -76.30 | BOEM   | 4/24 (247), 2/72 (119)                        | Telonics                       | 45        |    |
| 2012 | 27 Feb-2 Apr  | Night light/dipnet | 13                 | 1  | 12 | Mid-Atlantic      | Chesapeake Bay       | 38.06                | -75.97 | BOEM   | 4/24 (134), 4/13 (66), 2/120 (118), 4/13 (47) | Telonics                       | 45        |    |
| 2012 | 5-12 Oct      | Floating mist net  | 26                 | 26 | 0  | Quebec            | St. Lawrence Estuary | 48.73                | -69.06 | SDJV   | 2/72                                          | Telonics (23)<br>Microwave (3) | 49-53     |    |
| 2013 | 17 Feb-18 Apr | Night light/dipnet | 16                 | 4  | 12 | Mid-Atlantic      | Chesapeake Bay       | 38.72                | -76.28 | BOEM   | 4/13 (246), 2/120 (116)                       | Telonics                       | 45        |    |
| 2013 | 4 - 19 Mar    | Night light/dipnet | 4                  | 0  | 4  | Mid-Atlantic      | Delaware Bay         | 38.78                | -75.13 | BOEM   | 4/13 (246), 2/120 (116)                       | Telonics                       | 45        |    |
| 2013 | 2-10 Oct      | Floating mist net  | 53                 | 53 | 0  | Quebec            | St. Lawrence Estuary | 48.73                | -69.06 | SDJV   | 2/72                                          | Telonics                       | 35        |    |
| 2014 | 27-Jan        | Night light/dipnet | 1                  | 0  | 1  | Mid-Atlantic      | Delaware Bay         | 38.78                | -75.13 | BOEM   | 4/13 (246), 2/120 (116)                       | Telonics                       | 45        |    |

|      |      |               |                                 |    |    |    |                   |                         |       |        |              |                               |           |    |
|------|------|---------------|---------------------------------|----|----|----|-------------------|-------------------------|-------|--------|--------------|-------------------------------|-----------|----|
|      | 2014 | 16 Feb-9 Mar  | Night light/dipnet;<br>mist net | 11 | 4  | 7  | S. Atlantic Bight | Pamlico Sound           | 35.02 | -76.31 | BOEM         | 4/13 (246),<br>2/120 (116)    | Telonics  | 45 |
|      | 2014 | 27 Mar-3 Apr  | Night light/dipnet              | 8  | 3  | 5  | Mid-Atlantic      | Delaware Bay            | 39.07 | -75.35 | BOEM         | 4/13 (246),<br>2/120 (116)    | Telonics  | 45 |
|      | 2015 | 24-Feb        | Night light/dipnet              | 9  | 3  | 6  | Mid-Atlantic      | Chesapeake Bay          | 38.75 | -76.42 | BOEM         | 4/13 (246),<br>2/120 (116)    | Telonics  | 45 |
|      | 2015 | 2-7 Mar       | Night light/dipnet;<br>mist net | 6  | 1  | 5  | S. Atlantic Bight | Pamlico Sound           | 34.98 | -76.33 | BOEM         | 4/13 (246),<br>2/120 (116)    | Telonics  | 45 |
|      | 2015 | 21 Mar-14 Apr | Night light/dipnet              | 5  | 1  | 4  | Mid-Atlantic      | Delaware Bay            | 38.78 | -75.13 | BOEM         | 4/13 (246),<br>2/120 (116)    | Telonics  | 45 |
| WWSC | 2010 | 7-9 Aug       | Submerged net                   | 17 | 3  | 14 | Quebec            | St. Lawrence<br>Estuary | 48.74 | -69.05 | CWS          | 2/72                          | Microwave | 38 |
|      | 2010 | 4-Dec         | Mist net                        | 1  | 1  | 0  | Gulf of Maine     | Merrimack River         | 42.82 | -70.82 | BRI          | 2/72                          | Microwave | 38 |
|      | 2010 | 11-Dec        | Floating mist net               | 1  | 0  | 1  | S. New England    | Rhode Island            | 41.46 | -71.34 | SDJV         | 4/24 (116), 4/96              | Microwave | 38 |
|      | 2011 | 16-Mar        | Mist net                        | 1  | 0  | 1  | Gulf of Maine     | Maine                   | 43.53 | -70.32 | BRI          | 2/72                          | Microwave | 38 |
|      | 2012 | 15-20 Aug     | Submerged net                   | 17 | 5  | 12 | Quebec            | St. Lawrence<br>Estuary | 48.74 | -69.05 | CWS/<br>SDJV | 2/72                          | Telonics  | 35 |
|      | 2013 | 14-Feb        | Mist net                        | 2  | 2  | 0  | Gulf of Maine     | Boston Harbor           | 42.45 | -70.94 | SDJV         | 2/72                          | Telonics  | 45 |
|      | 2013 | 9-Mar         | Mist net                        | 2  | 2  | 0  | Great Lakes       | Lake Ontario            | 43.65 | -79.35 | SDJV         | 4/72                          | Microwave | 38 |
|      | 2014 | 12-15 Mar     | Floating mist net               | 3  | 3  | 0  | S. New England    | Long Island<br>Sound    | 40.98 | -72.50 | USFWS        | 4/96 (54), 4/72<br>(57), 4/96 | Telonics  | 35 |
|      | 2015 | 27 Oct-5 Nov  | Floating mist net               | 22 | 22 | 0  | S. New England    | Cape Cod Bay            | 41.74 | -70.22 | SDJV         | 4/72 (57), 4/96               | Microwave | 38 |
|      | 2016 | 17-23 Mar     | Floating mist net               | 3  | 3  | 0  | S. New England    | Long Island<br>Sound    | 41.02 | -72.59 | SDJV         | 4/96 (54), 4/72<br>(57), 4/96 | Telonics  | 35 |
|      | 2016 | 13-Apr        | Mist net                        | 1  | 1  | 0  | Gulf of Maine     | Maine                   | 43.54 | -70.33 | SDJV         | 4/96 (57), 4/72               | Microwave | 38 |
|      | 2016 | 17-21 Aug     | Submerged net                   | 26 | 26 | 0  | Quebec            | St. Lawrence<br>Estuary | 48.82 | -68.86 | SDJV         | 4/96 (57), 4/72               | Microwave | 38 |
