# Supplementary material for: Spatially explicit network analysis reveals multi‐species annual cycle movement patterns of sea ducks
Source: PubMed Central journal article supplement — Ecol Appl. 2019 May 29;29(5):e01919. doi: 10.1002/eap.1919 (PMC6851985; doi:10.1002/eap.1919), 2019-05-29
Supplement: EAP-29-na-s002.pdf [file EAP-29-na-s002.pdf]

## Supporting Information

Spatially-explicit network analysis reveals multi-species annual-cycle movement patterns of sea ducks

Juliet S. Lamb, Peter W.C. Paton, Jason E. Osenkowski, Shannon S. Badzinski, Alicia M. Berlin, Tim Bowman, Chris Dwyer, Luke J. Fara, Scott G. Gilliland, Kevin Kenow, Christine Lepage, Mark L. Mallory, Glenn H. Olsen, Matthew C. Perry, Scott A. Petrie, Jean-Pierre L. Savard, Lucas Savoy, Michael Schummer, Caleb S. Spiegel, and Scott R. McWilliams

Ecological Applications

Appendix S2

Table S1. Change in normalized centrality and connectivity values using alternative weighting systems relative to species-weighted<sup>1</sup> values.

|                     | Individual Only <sup>2</sup> |              |              |              | Individual & Species <sup>3</sup> |             |             |              | Duration <sup>4</sup> |              |              |             |       |
|---------------------|------------------------------|--------------|--------------|--------------|-----------------------------------|-------------|-------------|--------------|-----------------------|--------------|--------------|-------------|-------|
|                     | Indegree                     | Outdegree    | Betweenness  | dPC          | Indegree                          | Outdegree   | Betweenness | dPC          | Indegree              | Outdegree    | Betweenness  | dPC         |       |
| <b>Overall mean</b> | <b>-0.02</b>                 | <b>-0.02</b> | <b>-0.01</b> | <b>-0.01</b> | <b>-0.04</b>                      | <b>0.02</b> | <b>0.02</b> | <b>-0.02</b> | <b>-0.02</b>          | <b>-0.06</b> | <b>-0.01</b> | <b>0.02</b> |       |
| Node                | 1                            | 0.00         | 0.03         | -0.09        | -0.11                             | 0.00        | 0.07        | 0.35         | 0.11                  | 0.00         | -0.23        | -0.30       | 0.00  |
|                     | 2                            | -0.04        | -0.03        | 0.02         | -0.10                             | -0.06       | 0.07        | 0.01         | -0.02                 | 0.07         | -0.14        | -0.02       | 0.12  |
|                     | 3                            | -0.09        | -0.07        | 0.00         | 0.01                              | -0.08       | -0.02       | 0.00         | -0.04                 | 0.15         | -0.06        | 0.00        | 0.10  |
|                     | 4                            | -0.06        | -0.04        | 0.00         | 0.00                              | -0.01       | 0.01        | 0.00         | 0.00                  | 0.05         | -0.01        | 0.00        | 0.00  |
|                     | 5                            | 0.09         | 0.04         | -0.02        | -0.09                             | -0.04       | 0.05        | -0.01        | 0.03                  | -0.07        | -0.10        | 0.02        | -0.13 |
|                     | 6                            | 0.02         | 0.04         | 0.00         | -0.06                             | -0.01       | 0.05        | 0.00         | 0.03                  | -0.01        | -0.07        | 0.01        | -0.07 |
|                     | 7                            | -0.02        | -0.02        | 0.03         | 0.16                              | -0.12       | -0.04       | -0.07        | -0.19                 | 0.20         | -0.15        | 0.04        | 0.40  |
|                     | 8                            | -0.05        | -0.02        | 0.00         | 0.00                              | -0.03       | -0.02       | 0.00         | -0.01                 | 0.09         | -0.03        | 0.00        | 0.01  |
|                     | 9                            | 0.01         | 0.02         | -0.06        | -0.02                             | -0.03       | 0.03        | 0.02         | 0.00                  | 0.01         | -0.14        | 0.10        | 0.00  |
|                     | 10                           | -0.02        | 0.00         | -0.01        | -0.02                             | -0.01       | 0.02        | 0.00         | 0.00                  | 0.00         | -0.08        | 0.01        | -0.01 |
|                     | 11                           | 0.00         | 0.02         | 0.00         | 0.00                              | 0.00        | 0.00        | 0.00         | 0.00                  | 0.01         | -0.03        | 0.00        | 0.00  |
|                     | 12                           | -0.04        | -0.07        | -0.08        | 0.04                              | -0.14       | -0.01       | 0.01         | -0.15                 | -0.24        | -0.13        | -0.02       | -0.12 |
|                     | 13                           | 0.02         | 0.02         | 0.00         | -0.01                             | -0.01       | 0.02        | 0.00         | 0.00                  | -0.03        | -0.04        | 0.00        | -0.01 |
|                     | 14                           | -0.17        | -0.16        | -0.12        | -0.09                             | -0.06       | 0.16        | 0.27         | 0.17                  | 0.07         | -0.11        | 0.01        | -0.03 |
|                     | 15                           | -0.01        | -0.03        | 0.07         | 0.00                              | -0.09       | -0.01       | -0.03        | -0.04                 | -0.15        | -0.05        | -0.04       | -0.04 |
|                     | 16                           | -0.07        | 0.00         | 0.00         | 0.17                              | -0.14       | 0.00        | -0.15        | -0.38                 | -0.05        | 0.00         | 0.15        | 0.35  |
|                     | 17                           | -0.01        | 0.00         | 0.01         | 0.01                              | -0.05       | -0.02       | -0.01        | -0.03                 | 0.04         | -0.03        | 0.00        | 0.02  |
|                     | 18                           | 0.00         | -0.03        | 0.01         | -0.01                             | -0.05       | 0.02        | 0.03         | -0.01                 | -0.13        | -0.05        | 0.07        | -0.04 |
|                     | 19                           | -0.03        | -0.04        | -0.03        | 0.00                              | -0.06       | 0.00        | 0.00         | -0.02                 | -0.06        | 0.00         | -0.02       | 0.00  |
|                     | 20                           | -0.04        | -0.03        | -0.01        | 0.01                              | -0.05       | -0.01       | 0.00         | -0.02                 | -0.04        | 0.02         | 0.11        | 0.00  |
|                     | 21                           | -0.02        | -0.02        | 0.00         | -0.01                             | -0.02       | 0.01        | 0.00         | 0.00                  | -0.02        | -0.06        | 0.00        | 0.00  |
|                     | 22                           | -0.01        | -0.01        | 0.01         | 0.00                              | -0.04       | -0.01       | 0.01         | 0.00                  | -0.03        | -0.02        | -0.02       | 0.00  |
|                     | 23                           | -0.06        | -0.06        | 0.10         | -0.02                             | -0.06       | 0.02        | -0.07        | -0.02                 | -0.05        | -0.04        | -0.18       | 0.00  |
|                     | 24                           | 0.00         | -0.01        | 0.00         | 0.00                              | -0.01       | 0.01        | 0.00         | 0.00                  | -0.03        | -0.03        | -0.01       | 0.00  |
|                     | 25                           | 0.00         | 0.00         | -0.01        | -0.01                             | -0.01       | 0.01        | 0.00         | 0.00                  | -0.02        | -0.04        | -0.01       | 0.00  |
|                     | 26                           | 0.00         | 0.00         | 0.00         | 0.00                              | 0.00        | 0.00        | 0.00         | 0.00                  | -0.04        | 0.00         | 0.00        | 0.00  |
|                     | 27                           | 0.05         | 0.01         | -0.04        | -0.02                             | -0.03       | 0.02        | 0.02         | 0.00                  | -0.12        | -0.03        | -0.10       | -0.02 |
|                     | 28                           | 0.01         | 0.00         | 0.00         | 0.00                              | 0.00        | 0.00        | 0.00         | 0.00                  | -0.02        | 0.01         | 0.00        | 0.00  |
|                     | 29                           | -0.09        | -0.06        | -0.07        | -0.02                             | -0.04       | 0.01        | 0.03         | 0.00                  | -0.04        | -0.02        | -0.07       | -0.01 |
|                     | 30                           | -0.03        | -0.02        | 0.00         | 0.00                              | -0.03       | 0.01        | 0.05         | 0.00                  | -0.06        | -0.04        | -0.06       | -0.01 |
|                     | 31                           | -0.06        | -0.09        | 0.00         | 0.00                              | -0.03       | 0.03        | 0.01         | -0.02                 | -0.09        | -0.12        | -0.01       | -0.02 |

<sup>1</sup>Species-weighted: for centroid  $x$  in species  $i$ ,  $weight_x = (N \text{ centroids}_{total}) \times (N \text{ centroids}_i)^{-1}$

<sup>2</sup>Individual-only: for centroid  $x$  in individual  $j$ ,  $weight_x = (N \text{ centroids}_j)^{-1}$

<sup>3</sup>Individual & species: for centroid  $x$ , individual  $j$ , and species  $i$ ,  $weight_x = (N \text{ centroids}_j)^{-1} \times (N \text{ individuals}_i)^{-1}$

<sup>4</sup>Duration: for centroid  $x$ ,  $weight_x = (\text{days at centroid location}) \times 365^{-1}$

Table S2. Centrality values for global network with and without *dresseri* common eider.

|                     | With <i>S. m. dresseri</i> |           |             | Without <i>S. m. dresseri</i> |           |             | Difference in normalized scores |           |             |
|---------------------|----------------------------|-----------|-------------|-------------------------------|-----------|-------------|---------------------------------|-----------|-------------|
|                     | Indegree                   | Outdegree | Betweenness | Indegree                      | Outdegree | Betweenness | Indegree                        | Outdegree | Betweenness |
| <b>Overall mean</b> | 31.75                      | 31.82     | 17.90       | 30.15                         | 30.14     | 18.16       | 0.00                            | -0.01     | -0.02       |
| <b>Node</b>         |                            |           |             |                               |           |             |                                 |           |             |
| 1                   | 73.72                      | 71.55     | 49.87       | 65.77                         | 66.63     | 50.91       | -0.09                           | -0.05     | 0.00        |
| 2                   | 60.15                      | 61.34     | 32.98       | 52.15                         | 52.15     | 28.72       | -0.10                           | -0.10     | -0.06       |
| 3                   | 37.42                      | 32.86     | 7.96        | 37.42                         | 32.86     | 8.51        | 0.01                            | 0.00      | 0.00        |
| 4                   | 17.32                      | 12.41     | 0.84        | 17.32                         | 12.41     | 1.00        | 0.00                            | 0.00      | 0.00        |
| 5                   | 41.67                      | 40.82     | 12.64       | 28.62                         | 28.20     | 12.30       | -0.18                           | -0.14     | -0.01       |
| 6                   | 20.49                      | 26.61     | 5.22        | 15.30                         | 16.97     | 4.67        | -0.07                           | -0.11     | -0.01       |
| 7                   | 38.50                      | 43.15     | 10.66       | 38.50                         | 43.15     | 11.35       | 0.01                            | 0.01      | 0.01        |
| 8                   | 18.97                      | 17.44     | 2.41        | 18.97                         | 17.44     | 2.57        | 0.01                            | 0.00      | 0.00        |
| 9                   | 24.60                      | 31.70     | 15.80       | 24.60                         | 31.70     | 15.79       | 0.01                            | 0.00      | 0.00        |
| 10                  | 16.97                      | 23.87     | 9.77        | 16.97                         | 23.87     | 9.81        | 0.00                            | 0.00      | 0.00        |
| 11                  | 4.00                       | 3.87      | 0.08        | 4.00                          | 3.87      | 0.08        | 0.00                            | 0.00      | 0.00        |
| 12                  | 65.45                      | 73.36     | 38.58       | 63.61                         | 71.13     | 41.25       | -0.01                           | -0.02     | 0.02        |
| 13                  | 17.23                      | 17.55     | 3.70        | 11.31                         | 11.22     | 3.40        | -0.08                           | -0.07     | 0.00        |
| 14                  | 60.24                      | 61.65     | 50.90       | 60.24                         | 61.65     | 51.27       | 0.02                            | 0.01      | -0.01       |
| 15                  | 40.47                      | 43.89     | 19.34       | 38.52                         | 40.82     | 20.73       | -0.02                           | -0.03     | 0.01        |
| 16                  | 73.86                      | 88.18     | 80.98       | 72.21                         | 87.18     | 82.97       | 0.00                            | 0.00      | 0.00        |
| 17                  | 21.84                      | 21.91     | 3.58        | 18.11                         | 19.21     | 2.99        | -0.05                           | -0.03     | -0.01       |
| 18                  | 38.57                      | 29.39     | 15.50       | 38.57                         | 29.39     | 15.59       | 0.01                            | 0.00      | 0.00        |
| 19                  | 36.61                      | 28.28     | 39.81       | 36.61                         | 28.28     | 40.46       | 0.01                            | 0.00      | 0.00        |
| 20                  | 26.53                      | 25.46     | 11.99       | 26.53                         | 25.46     | 13.58       | 0.01                            | 0.00      | 0.02        |
| 21                  | 25.40                      | 17.75     | 3.68        | 25.40                         | 17.75     | 3.68        | 0.01                            | 0.00      | 0.00        |
| 22                  | 15.49                      | 17.66     | 8.74        | 15.49                         | 17.66     | 8.88        | 0.00                            | 0.00      | 0.00        |
| 23                  | 47.33                      | 45.60     | 65.05       | 47.33                         | 45.60     | 65.76       | 0.02                            | 0.01      | -0.01       |
| 24                  | 17.23                      | 10.95     | 7.00        | 17.23                         | 10.95     | 7.12        | 0.00                            | 0.00      | 0.00        |
| 25                  | 14.97                      | 12.33     | 4.55        | 14.97                         | 12.33     | 4.57        | 0.00                            | 0.00      | 0.00        |
| 26                  | 7.35                       | 4.24      | 2.16        | 7.35                          | 4.24      | 2.22        | 0.00                            | 0.00      | 0.00        |
| 27                  | 27.13                      | 18.00     | 15.70       | 27.13                         | 18.00     | 15.87       | 0.01                            | 0.00      | 0.00        |
| 28                  | 5.00                       | 3.00      | 0.42        | 5.00                          | 3.00      | 0.44        | 0.00                            | 0.00      | 0.00        |
| 29                  | 35.10                      | 27.95     | 8.40        | 35.10                         | 27.95     | 8.71        | 0.01                            | 0.00      | 0.00        |
| 30                  | 27.50                      | 25.75     | 11.35       | 27.50                         | 25.75     | 11.42       | 0.01                            | 0.00      | 0.00        |
| 31                  | 27.28                      | 47.91     | 15.35       | 26.83                         | 47.55     | 16.38       | 0.00                            | 0.00      | 0.01        |
